# Supplementary material for: Effects of Cinnamon Essential Oil on Oxidative Damage and Outer Membrane Protein Genes of Salmonella enteritidis Cells
Source: MDPI journal article supplement (doi:10.3390/foods11152234), 2022-07-27
Supplement: s1 [file s1]

**Table S1.** The primer sequences for q-PCR amplification.

| primer     | Primer sequence (5'-3')  | Fragment length<br>(bp) | Annealing temperature<br>(°C) |
|------------|--------------------------|-------------------------|-------------------------------|
| 16S rRNA-S | AGGTGTAGCGGTGAAATGCG     | 141                     | 60                            |
| 16S rRNA-A | CATCGTTTACGGCGTGGACT     |                         | 60                            |
| OmpA-S     | GGCTTTGAAATGGGCTACGACT   | 219                     | 60                            |
| OmpA-A     | GCCGGTGTCGTGGTCTTTAGT    |                         | 60                            |
| OmpF-S     | CCTACTTCTCCGGCGAAACCT    | 139                     | 60                            |
| OmpF-A     | CCCTGATACTGGATACCGAAAGAG |                         | 60                            |
| OmpW-S     | CAGCAAAGTGCGTCCTTATGTC   | 292                     | 60                            |
| OmpW-A     | ACGATAGCCTGCCGAGAACATA   |                         | 60                            |
| OmpX-S     | CGGGCGATTACAACAAAGGTC    | 248                     | 60                            |
| OmpX-A     | GTCAACGCTACGAATACGGCTC   |                         | 60                            |
